# Supplementary material
Source: PubMed Central journal article supplement (PMC6140336)
Supplement: NIHMS1504900-supplement-13.pdf [file NIHMS1504900-supplement-13.pdf]

**Table S1. Related to Figures 2 and 6. Data collection and refinement statistics**

|                                | 589-B35(HIV)                     | 55-B35(HIV)                            | 55-B35(Pep20)                          |
|--------------------------------|----------------------------------|----------------------------------------|----------------------------------------|
| Wavelength                     | 0.9795                           | 1                                      | 0.9795                                 |
| Resolution range               | 39.1 - 3.35 (3.47 - 3.35)        | 45.15 - 1.898 (1.966 - 1.898)          | 46.82 - 1.75 (1.813 - 1.75)            |
| Space group                    | C 1 2 1                          | C 1 2 1                                | C 1 2 1                                |
| Unit cell                      | 156.48 59.28 123.57 90 110.77 90 | 199.996 61.414 92.064 90<br>105.628 90 | 194.492 61.698 92.145 90 104.872<br>90 |
| Total reflections              | 50510 (4562)                     | 287500 (25914)                         | 299246 (26653)                         |
| Unique reflections             | 15094 (1439)                     | 83485 (7910)                           | 103605 (10087)                         |
| Multiplicity                   | 3.3 (3.2)                        | 3.4 (3.3)                              | 2.9 (2.6)                              |
| Completeness (%)               | 97.03 (94.02)                    | 97.79 (92.69)                          | 97.14 (94.81)                          |
| Mean I/sigma(I)                | 8.96 (1.60)                      | 4.67 (0.70)                            | 10.84 (2.34)                           |
| Wilson B-factor                | 102.67                           | 34.9                                   | 19.44                                  |
| R-merge                        | 0.1116 (0.7365)                  | 0.1382 (1.313)                         | 0.06306 (0.4594)                       |
| R-meas                         | 0.1333 (0.889)                   | 0.1628 (1.563)                         | 0.07631 (0.5622)                       |
| R-pim                          | 0.07175 (0.489)                  | 0.08533 (0.8382)                       | 0.04226 (0.3183)                       |
| CC1/2                          | 0.995 (0.795)                    | 0.985 (0.406)                          | 0.988 (0.696)                          |
| CC*                            | 0.999 (0.941)                    | 0.996 (0.76)                           | 0.997 (0.906)                          |
| Reflections used in refinement | 15082 (1431)                     | 83453 (7885)                           | 103600 (10087)                         |
| Reflections used for R-free    | 708 (66)                         | 2000 (190)                             | 1856 (180)                             |
| R-work                         | 0.2451 (0.3388)                  | 0.1876 (0.3569)                        | 0.1585 (0.2261)                        |
| R-free                         | 0.2745 (0.3637)                  | 0.2160 (0.3988)                        | 0.1834 (0.2512)                        |
| CC(work)                       | 0.936 (0.762)                    | 0.962 (0.676)                          | 0.965 (0.873)                          |
| CC(free)                       | 0.939 (0.716)                    | 0.945 (0.566)                          | 0.960 (0.803)                          |
| Number of non-hydrogen atoms   | 6445                             | 7022                                   | 7447                                   |
| macromolecules                 | 6399                             | 6621                                   | 6648                                   |
| ligands                        | 45                               | 37                                     | 182                                    |
| solvent                        | 1                                | 364                                    | 617                                    |
| Protein residues               | 825                              | 826                                    | 822                                    |
| RMS(bonds)                     | 0.002                            | 0.003                                  | 0.009                                  |
| RMS(angles)                    | 0.56                             | 0.6                                    | 0.98                                   |
| Ramachandran favored (%)       | 95.66                            | 98.28                                  | 98.4                                   |
| Ramachandran allowed (%)       | 4.21                             | 1.72                                   | 1.6                                    |
| Ramachandran outliers (%)      | 0.12                             | 0                                      | 0                                      |
| Rotamer outliers (%)           | 2.1                              | 1.12                                   | 0.55                                   |
| Clashscore                     | 7.37                             | 1.86                                   | 2.25                                   |
| Average B-factor               | 121.22                           | 45.99                                  | 27.26                                  |
| macromolecules                 | 120.9                            | 45.98                                  | 26.1                                   |
| ligands                        | 167.48                           | 80.16                                  | 42.29                                  |
| solvent                        | 120.15                           | 42.76                                  | 35.32                                  |
| Number of TLS groups           | 8                                | 22                                     | 30                                     |

Statistics for the highest-resolution shell are shown in parentheses.
